# Supplementary material for: A Three-Lesson Teaching Unit Significantly Increases High School Students’ Knowledge about Epilepsy and Positively Influences Their Attitude towards This Disease
Source: PubMed Central journal article supplement (PMC4771028; doi:10.1371/journal.pone.0150014), 2016-02-26
Supplement: pone.0150014.s001.pdf [file pone.0150014.s001.pdf]

## Supplemental Material 1.

[Student questionnaire (post-test). Correct answers are printed bold].

*Dear Student!*

*Please fill in this second questionnaire diligently and honestly. This is important to allow us to really improve the teaching unit. Most questions allow for only ONE answer. In case more than one is possible, this is explicitly mentioned. If you are really uncertain with a particular question, you may tick off "I am not sure"*

*Thank you very much for your assistance with this project!!!*

*Dr. Uwe Simon, Graz University*

*Code: First two letters of your first name  
+ first two letters of your mother's first name  
+ first two letters of your father's first name*

*(Example: Student's name: **ALOIS**,  
mother's name: **SONJA**,  
father's name **HUBERT**:  
→ **ALSOHU**)*

Code: \_\_\_\_\_

Age: \_\_\_\_\_

female

male

Mother tongue: \_\_\_\_\_

Nationality: \_\_\_\_\_

Number of close relatives who work in the medical field (e.g. parents, uncle/aunt as doctor, nurse, etc.): \_\_\_\_\_

**Do you know, what ‘epilepsy’ is?**

- yes
- no
- I am not sure

**If ‘yes’, what is the source of your knowledge? (more than one possibility)**

- by hearsay
- relatives, friends, acquaintances
- media
- others (which?): \_\_\_\_\_

**Write spontaneously down some key words and/or questions concerning ‘epilepsy’!**

---

---

---

---

**Do you feel uncertain when meeting a person of whom you know that he/she has epilepsy?**

- yes
- no

**If “yes“, why?**

---

---

---

---

**Is ‘epilepsy’ the same as ‘seizure’?**

- yes
- no**
- I am not sure

**Can a person, who has a seizure now and then, work as a teacher?**

- yes**
- no
- I am not sure

**Is epilepsy a mental illness?**

- yes
- no**
- I am not sure

**Is ‘loss of consciousness’ a possible symptom of a seizure?**

- yes**
- no
- I am not sure

**Is it possible to diagnose epilepsy using electroencephalography (EEG)?**

- yes**
- no
- I am not sure

**Can a person, who has a seizure now and then, work as a lorry driver?**

- yes
- no**
- I am not sure

**Should people with epilepsy be allowed to marry?**

- yes**
- no
- I am not sure

**Does epileptic activity during a generalized seizure occur in only one half of the brain?**

- yes
- no**
- I am not sure

**Is it always possible to recognize a seizure?**

- yes
- no**
- I am not sure

**If 'yes', how?**

---

---

---

---

**Are people with epilepsy able to live as self-dependent as people without epilepsy?**

- yes**
- no
- I am not sure

**Should you always immediately call the ambulance in case you observe a seizure?**

- yes
- no**
- I am not sure

**Can someone having had a generalized seizure usually not recall this experience?**

- yes**
- no
- I am not sure

**Can a person, who has a seizure now and then, work as a metal worker?**

- yes
- no**
- I am not sure

**Is 'convulsion/twitching of single body parts' a possible symptom of a seizure?**

- yes**
- no
- I am not sure

**Do seizures happening with different people always look the same?**

- yes
- no**
- I am not sure

**Are children/adolescents with epilepsy able to attend regular schools?**

- yes**
- no
- I am not sure

**Should you place soft cushions below a person having a seizure?**

- yes**
- no
- I am not sure

**Are people with epilepsy unpredictable and dangerous?**

- yes
- no**
- I am not sure

**Are people with epilepsy allowed to do sport?**

- yes**
- no
- I am not sure

**Is 'absurd behavior' a possible symptom of a seizure?**

- yes**
- no
- I am not sure

**Can a head injury cause a seizure?**

- yes**
- no
- I am not sure

**Should women with epilepsy be allowed to become pregnant?**

- yes**
- no
- I am not sure

**Should you place a hard object in the mouth of someone having a seizure to protect the tongue, or hold apart the jaw?**

- yes
- no**
- I am not sure

**Can a person, who has a seizure now and then, work as a nurse?**

- yes
- no**
- I am not sure

**Can an operation help people with epilepsy?**

- yes**
- no
- I am not sure

**Is it possible to diagnose epilepsy using magnetic resonance tomography (MRT)?**

- yes**
- no
- I am not sure

**Should you wet the face of someone who has a seizure?**

- yes
- no**
- I am not sure

**Is epilepsy generally a heritable disease?**

- yes
- no**
- I am not sure

**Should you put a person, who has had a seizure with convulsion and loss of consciousness, into recovery position?**

- yes**
- no
- I am not sure

**Do people with epilepsy always have seizures regularly?**

- yes
- no**
- I am not sure

**Should you try to help a person lay down, if he/she seems to get a seizure soon?**

- yes**
- no
- I am not sure

**Are people with epilepsy less intelligent?**

- yes
- no**
- I am not sure

**Is 'convulsion/twitching of the whole body' a possible symptom of a seizure?**

- yes**
- no
- I am not sure

**Is ‘temperature‘ a possible symptom of a seizure?**

- yes
- no**
- I am not sure

**Should you firmly hold a person having a seizure?**

- yes
- no**
- I am not sure

**Can teachers expect children with epilepsy to perform equivalently to those without epilepsy?**

- yes**
- no
- I am not sure

**Can medication usually help people with epilepsy?**

- yes**
- no
- I am not sure

**Is ‘falling down‘ a possible symptom of a seizure?**

- yes**
- no
- I am not sure

**Do people with epilepsy always need a lifelong treatment?**

- yes
- no**
- I am not sure

**Can shortage of sleep cause a seizure?**

- yes**
- no
- I am not sure

**Should you remove sharp objects, edged furniture etc., when you observe a seizure?**

- yes**
- no
- I am not sure

**Can a person, who has a seizure now and then, work as a police officer?**

- yes
- no**
- I am not sure

**Would you begin a love relationship with someone you know has epilepsy?**

- yes**
- no
- I am not sure

**Can extensive drinking of alcohol cause a seizure?**

- yes
- no
- I am not sure

*And now some questions concerning the last lessons:*

**Note down some key words you think are important to describe epilepsy!**

---

---

---

---

**During the lessons you have watched seizures in the videos. How did you feel?**

---

---

---

---

**Was the topic presented in an interesting way?**

- yes
- no

**Was the logic of the teaching unit clear to you?**

- yes
- no

**Was the material comprehensible, helpful, and clear to you?**

- yes
- no

**What could have been better?**

---

---

---

---

**Is there anything you would include in the teaching unit which has not been dealt with?**

---

---

---

---

**Reflecting on the lessons about 'epilepsy: What was new for you?**

---

---

---

---

**Has the teaching unit changed your attitude towards people with epilepsy?**

- yes
- no

**If 'yes', how?**

---

---

---

---

*Once again: Many thanks for your efforts!*
