# Supplementary material for: A Three-Lesson Teaching Unit Significantly Increases High School Students’ Knowledge about Epilepsy and Positively Influences Their Attitude towards This Disease
Source: PubMed Central journal article supplement (PMC4771028; doi:10.1371/journal.pone.0150014), 2016-02-26
Supplement: pone.0150014.s003.pdf [file pone.0150014.s003.pdf]

**Supplementary Table 1. Descriptives for scale scores.** CG/TG = control/test group; 1/2/3 = pre-/post-/follow up-test; 1/2/3/4/5 = domains 1 – 5.

| Group * time * domain |     | Mean | Std. Error | 95% Confidence Interval |             |
|-----------------------|-----|------|------------|-------------------------|-------------|
|                       |     |      |            | Lower Bound             | Upper Bound |
| CG                    | 1 1 | ,468 | ,025       | ,419                    | ,517        |
|                       | 2   | ,665 | ,027       | ,611                    | ,719        |
|                       | 3   | ,272 | ,027       | ,219                    | ,326        |
|                       | 4   | ,755 | ,028       | ,699                    | ,811        |
|                       | 5   | ,486 | ,026       | ,435                    | ,537        |
|                       | 2 1 | ,472 | ,020       | ,432                    | ,512        |
|                       | 2   | ,663 | ,024       | ,616                    | ,710        |
|                       | 3   | ,251 | ,022       | ,208                    | ,295        |
|                       | 4   | ,753 | ,022       | ,710                    | ,796        |
|                       | 5   | ,524 | ,020       | ,484                    | ,564        |
|                       | 3 1 | ,471 | ,021       | ,430                    | ,512        |
|                       | 2   | ,623 | ,025       | ,573                    | ,673        |
|                       | 3   | ,235 | ,026       | ,184                    | ,287        |
|                       | 4   | ,769 | ,021       | ,728                    | ,809        |
|                       | 5   | ,532 | ,023       | ,487                    | ,577        |
| TG                    | 1 1 | ,430 | ,019       | ,392                    | ,468        |
|                       | 2   | ,588 | ,021       | ,546                    | ,630        |
|                       | 3   | ,240 | ,021       | ,198                    | ,281        |
|                       | 4   | ,747 | ,022       | ,703                    | ,790        |
|                       | 5   | ,402 | ,020       | ,363                    | ,442        |
|                       | 2 1 | ,813 | ,016       | ,782                    | ,844        |
|                       | 2   | ,807 | ,018       | ,771                    | ,843        |
|                       | 3   | ,898 | ,017       | ,865                    | ,932        |
|                       | 4   | ,931 | ,017       | ,897                    | ,964        |
|                       | 5   | ,893 | ,016       | ,862                    | ,924        |
|                       | 3 1 | ,779 | ,016       | ,747                    | ,811        |
|                       | 2   | ,756 | ,019       | ,718                    | ,794        |
|                       | 3   | ,805 | ,020       | ,765                    | ,845        |
|                       | 4   | ,927 | ,016       | ,895                    | ,958        |
|                       | 5   | ,870 | ,018       | ,835                    | ,905        |
